# Supplementary material
Source: HighWire-hosted journal article supplement (https://www.jneurosci.org/highwire/filestream/600138/field_highwire_adjunct_files/2/Figure_S3.pdf)

Peptide 234

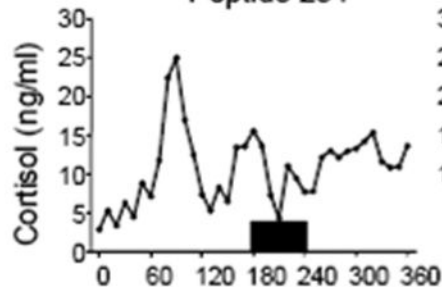

aCSF

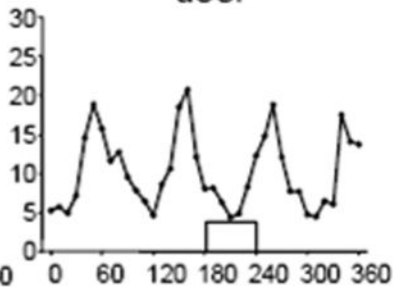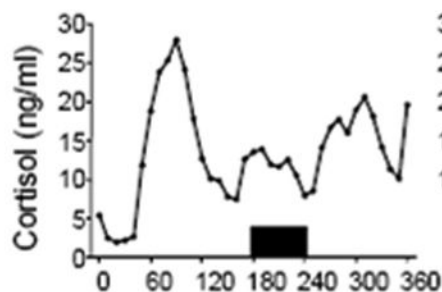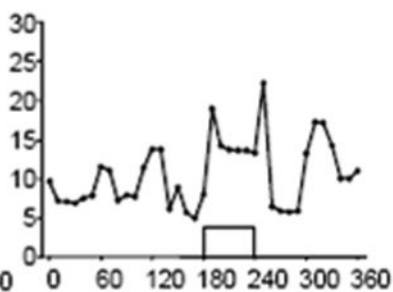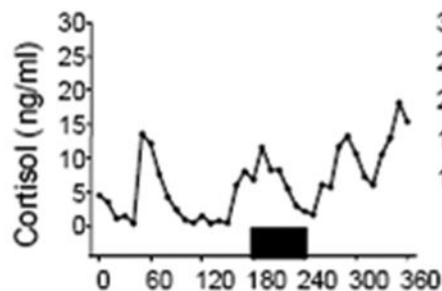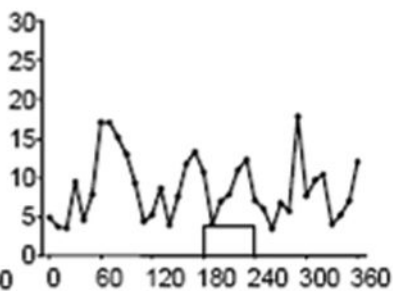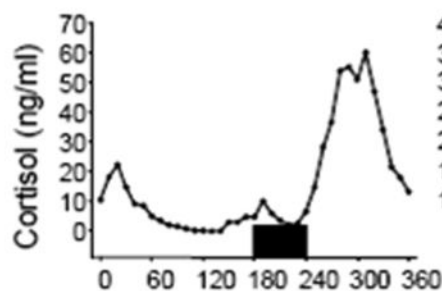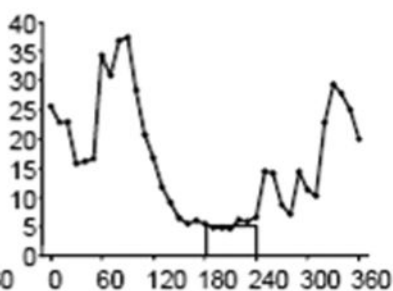

Time (min)

Time (min)

Supplement: Figure_S3.pdf [file Figure_S3.pdf]
